# Supplementary material
Source: Springer Nature journal article supplement (https://www.springermedizin.de/resource/supplementary/12889_2011_3831_MOESM1_ESM.pdf/9490822)
Supplement: MOESM1 [file 9490822]

Recruitment: Screening clinic out-patients (18 years and above) at  
Dr. George Mukhari Hospital (n=2500)

Risk evaluation based on Alcohol Risk (AUDIT) score

Score <8 for men and <7 for  
women

Health education pamphlet (exit  
study)

AUDIT score: 7/8-19  
Invited for inclusion in study

Score 20 and more  
Referred for further  
management (exit study)

Randomization of individual hospital out-patients (with 280 screened medium risk drinkers  
(AUDIT score 7/8-19))

Intervention (with 140 screened medium risk  
drinkers)

Brief intervention (one session) on alcohol  
problems

Follow-up assessments: 6 and 12 months  
following intervention

Control (with 140 screened medium risk  
drinkers)

Receive alcohol health information

Follow-up assessments: 6 and 12 months  
following intervention

Delayed intervention with control group if  
SBI is shown to be effective

**Figure 1 Overview of study activities**
